# Supplementary material for: Effects of fructose-containing sweeteners on fructose intestinal, hepatic, and oral bioavailability in dual-catheterized rats
Source: PubMed Central journal article supplement (PMC6224110; doi:10.1371/journal.pone.0207024), 2018-11-08
Supplement: pone.0207024.s001.pdf [file pone.0207024.s001.pdf]

**S1 Table. Data for Fructose Concentration versus Time in Femoral and Portal Veins.**

| <b>Rat ID</b> | <b>Gavage Treatment</b> | <b>Vein</b> | <b>Time (min)</b> | <b>Fructose (mg/dL)</b> |
|---------------|-------------------------|-------------|-------------------|-------------------------|
| Rat #102      | Water                   | Femoral     | 0                 | 1.47                    |
| Rat #102      | Water                   | Femoral     | 15                | 1.53                    |
| Rat #102      | Water                   | Femoral     | 30                | 1.63                    |
| Rat #102      | Water                   | Femoral     | 60                | 1.81                    |
| Rat #102      | Water                   | Femoral     | 120               | 1.77                    |
| Rat #102      | Water                   | Femoral     | 240               | 1.87                    |
| Rat #102      | Water                   | Femoral     | 360               | 1.66                    |
| Rat #105      | Water                   | Femoral     | 0                 | 1.69                    |
| Rat #105      | Water                   | Femoral     | 15                | 1.82                    |
| Rat #105      | Water                   | Femoral     | 30                | 1.83                    |
| Rat #105      | Water                   | Femoral     | 60                | 1.98                    |
| Rat #105      | Water                   | Femoral     | 120               | 1.82                    |
| Rat #105      | Water                   | Femoral     | 240               | 1.81                    |
| Rat #105      | Water                   | Femoral     | 360               | 1.68                    |
| Rat #108      | Water                   | Femoral     | 0                 | 1.61                    |
| Rat #108      | Water                   | Femoral     | 15                | 1.42                    |
| Rat #108      | Water                   | Femoral     | 30                | 1.80                    |
| Rat #108      | Water                   | Femoral     | 60                | 2.06                    |
| Rat #108      | Water                   | Femoral     | 120               | 2.02                    |
| Rat #108      | Water                   | Femoral     | 240               | 2.01                    |
| Rat #108      | Water                   | Femoral     | 360               | 2.03                    |
| Rat #112      | Water                   | Femoral     | 0                 | 1.70                    |
| Rat #112      | Water                   | Femoral     | 15                | 1.87                    |
| Rat #112      | Water                   | Femoral     | 30                | 1.72                    |
| Rat #112      | Water                   | Femoral     | 60                | 1.81                    |
| Rat #112      | Water                   | Femoral     | 120               | 1.90                    |
| Rat #112      | Water                   | Femoral     | 240               | 1.93                    |
| Rat #112      | Water                   | Femoral     | 360               | 1.85                    |
| Rat #114      | Water                   | Femoral     | 0                 | 1.68                    |
| Rat #114      | Water                   | Femoral     | 15                | 1.67                    |
| Rat #114      | Water                   | Femoral     | 30                | 1.63                    |
| Rat #114      | Water                   | Femoral     | 60                | 1.79                    |
| Rat #114      | Water                   | Femoral     | 120               | 1.70                    |
| Rat #114      | Water                   | Femoral     | 240               | 1.72                    |
| Rat #114      | Water                   | Femoral     | 360               | 1.76                    |
| Rat #117      | Water                   | Femoral     | 0                 | 1.98                    |
| Rat #117      | Water                   | Femoral     | 15                | 2.12                    |
| Rat #117      | Water                   | Femoral     | 30                | 2.21                    |
| Rat #117      | Water                   | Femoral     | 60                | 1.98                    |
| Rat #117      | Water                   | Femoral     | 120               | 2.23                    |
| Rat #117      | Water                   | Femoral     | 240               | 1.85                    |
| Rat #117      | Water                   | Femoral     | 360               | 1.80                    |
| Rat #120      | Water                   | Femoral     | 0                 | 1.90                    |
| Rat #120      | Water                   | Femoral     | 15                | 1.91                    |
| Rat #120      | Water                   | Femoral     | 30                | 1.96                    |
| Rat #120      | Water                   | Femoral     | 60                | 1.89                    |
| Rat #120      | Water                   | Femoral     | 120               | 1.97                    |
| Rat #120      | Water                   | Femoral     | 240               | 1.98                    |
| Rat #120      | Water                   | Femoral     | 360               | 1.80                    |
| Rat #123      | Water                   | Femoral     | 0                 | 1.57                    |
| Rat #123      | Water                   | Femoral     | 15                | 1.54                    |
| Rat #123      | Water                   | Femoral     | 30                | 1.59                    |
| Rat #123      | Water                   | Femoral     | 60                | 1.68                    |
| Rat #123      | Water                   | Femoral     | 120               | 1.66                    |
| Rat #123      | Water                   | Femoral     | 240               | 1.66                    |
| Rat #123      | Water                   | Femoral     | 360               | 1.59                    |
| Rat #204      | Sucrose                 | Femoral     | 0                 | 1.32                    |
| Rat #204      | Sucrose                 | Femoral     | 15                | 4.44                    |
| Rat #204      | Sucrose                 | Femoral     | 30                | 4.41                    |
| Rat #204      | Sucrose                 | Femoral     | 60                | 2.80                    |
| Rat #204      | Sucrose                 | Femoral     | 120               | 1.46                    |
| Rat #204      | Sucrose                 | Femoral     | 240               | 1.42                    |
| Rat #204      | Sucrose                 | Femoral     | 360               | 1.39                    |
| Rat #205      | Sucrose                 | Femoral     | 0                 | 1.86                    |

**S1 Table. Data for Fructose Concentration versus Time in Femoral and Portal Veins.**

| <b>Rat ID</b> | <b>Gavage Treatment</b> | <b>Vein</b> | <b>Time (min)</b> | <b>Fructose (mg/dL)</b> |
|---------------|-------------------------|-------------|-------------------|-------------------------|
| Rat #205      | Sucrose                 | Femoral     | 15                | 5.10                    |
| Rat #205      | Sucrose                 | Femoral     | 30                | 6.52                    |
| Rat #205      | Sucrose                 | Femoral     | 60                | 2.36                    |
| Rat #205      | Sucrose                 | Femoral     | 120               | 1.53                    |
| Rat #205      | Sucrose                 | Femoral     | 240               | 1.59                    |
| Rat #205      | Sucrose                 | Femoral     | 360               | 1.45                    |
| Rat #211      | Sucrose                 | Femoral     | 0                 | 1.36                    |
| Rat #211      | Sucrose                 | Femoral     | 15                | 3.82                    |
| Rat #211      | Sucrose                 | Femoral     | 30                | 4.36                    |
| Rat #211      | Sucrose                 | Femoral     | 60                | 2.10                    |
| Rat #211      | Sucrose                 | Femoral     | 120               | 1.55                    |
| Rat #211      | Sucrose                 | Femoral     | 240               | 1.49                    |
| Rat #211      | Sucrose                 | Femoral     | 360               | 1.22                    |
| Rat #221      | Sucrose                 | Femoral     | 0                 | 1.84                    |
| Rat #221      | Sucrose                 | Femoral     | 15                | 5.53                    |
| Rat #221      | Sucrose                 | Femoral     | 30                | 6.89                    |
| Rat #221      | Sucrose                 | Femoral     | 60                | 3.77                    |
| Rat #221      | Sucrose                 | Femoral     | 120               | 2.45                    |
| Rat #221      | Sucrose                 | Femoral     | 240               | 2.13                    |
| Rat #221      | Sucrose                 | Femoral     | 360               | 2.29                    |
| Rat #222      | Sucrose                 | Femoral     | 0                 | 2.25                    |
| Rat #222      | Sucrose                 | Femoral     | 15                | 2.87                    |
| Rat #222      | Sucrose                 | Femoral     | 30                | 5.92                    |
| Rat #222      | Sucrose                 | Femoral     | 60                | 4.84                    |
| Rat #222      | Sucrose                 | Femoral     | 120               | 2.50                    |
| Rat #222      | Sucrose                 | Femoral     | 240               | 2.54                    |
| Rat #222      | Sucrose                 | Femoral     | 360               | 2.27                    |
| Rat #228      | Sucrose                 | Femoral     | 0                 | 1.66                    |
| Rat #228      | Sucrose                 | Femoral     | 15                | 4.30                    |
| Rat #228      | Sucrose                 | Femoral     | 30                | 4.37                    |
| Rat #228      | Sucrose                 | Femoral     | 60                | 3.46                    |
| Rat #228      | Sucrose                 | Femoral     | 120               | 2.19                    |
| Rat #228      | Sucrose                 | Femoral     | 240               | 1.88                    |
| Rat #228      | Sucrose                 | Femoral     | 360               | 1.68                    |
| Rat #231      | Sucrose                 | Femoral     | 0                 | 1.45                    |
| Rat #231      | Sucrose                 | Femoral     | 15                | 4.52                    |
| Rat #231      | Sucrose                 | Femoral     | 30                | 5.62                    |
| Rat #231      | Sucrose                 | Femoral     | 60                | 4.40                    |
| Rat #231      | Sucrose                 | Femoral     | 120               | 1.93                    |
| Rat #231      | Sucrose                 | Femoral     | 240               | 2.11                    |
| Rat #231      | Sucrose                 | Femoral     | 360               | 1.59                    |
| Rat #236      | Sucrose                 | Femoral     | 0                 | 1.15                    |
| Rat #236      | Sucrose                 | Femoral     | 15                | 4.57                    |
| Rat #236      | Sucrose                 | Femoral     | 30                | 5.31                    |
| Rat #236      | Sucrose                 | Femoral     | 60                | 3.15                    |
| Rat #236      | Sucrose                 | Femoral     | 120               | 1.53                    |
| Rat #236      | Sucrose                 | Femoral     | 240               | 2.16                    |
| Rat #236      | Sucrose                 | Femoral     | 360               | 1.86                    |
| Rat #237      | Sucrose                 | Femoral     | 0                 | 1.63                    |
| Rat #237      | Sucrose                 | Femoral     | 15                | 6.30                    |
| Rat #237      | Sucrose                 | Femoral     | 30                | 6.73                    |
| Rat #237      | Sucrose                 | Femoral     | 60                | 3.55                    |
| Rat #237      | Sucrose                 | Femoral     | 120               | 2.36                    |
| Rat #237      | Sucrose                 | Femoral     | 240               | 2.00                    |
| Rat #237      | Sucrose                 | Femoral     | 360               | 2.03                    |
| Rat #101      | Glucose                 | Femoral     | 0                 | 1.53                    |
| Rat #101      | Glucose                 | Femoral     | 15                | 1.57                    |
| Rat #101      | Glucose                 | Femoral     | 30                | 1.59                    |
| Rat #101      | Glucose                 | Femoral     | 60                | 1.64                    |
| Rat #101      | Glucose                 | Femoral     | 120               | 1.66                    |
| Rat #101      | Glucose                 | Femoral     | 240               | 1.70                    |
| Rat #101      | Glucose                 | Femoral     | 360               | 1.45                    |
| Rat #103      | Glucose                 | Femoral     | 0                 | 1.40                    |
| Rat #103      | Glucose                 | Femoral     | 15                | 1.49                    |

**S1 Table. Data for Fructose Concentration versus Time in Femoral and Portal Veins.**

| <b>Rat ID</b> | <b>Gavage Treatment</b> | <b>Vein</b> | <b>Time (min)</b> | <b>Fructose (mg/dL)</b> |
|---------------|-------------------------|-------------|-------------------|-------------------------|
| Rat #103      | Glucose                 | Femoral     | 30                | 1.45                    |
| Rat #103      | Glucose                 | Femoral     | 60                | 1.50                    |
| Rat #103      | Glucose                 | Femoral     | 120               | 1.63                    |
| Rat #103      | Glucose                 | Femoral     | 240               | 1.59                    |
| Rat #103      | Glucose                 | Femoral     | 360               | 1.51                    |
| Rat #107      | Glucose                 | Femoral     | 0                 | 1.68                    |
| Rat #107      | Glucose                 | Femoral     | 15                | 1.95                    |
| Rat #107      | Glucose                 | Femoral     | 30                | 1.78                    |
| Rat #107      | Glucose                 | Femoral     | 60                | 1.81                    |
| Rat #107      | Glucose                 | Femoral     | 120               | 2.02                    |
| Rat #107      | Glucose                 | Femoral     | 240               | 1.80                    |
| Rat #107      | Glucose                 | Femoral     | 360               | 1.79                    |
| Rat #110      | Glucose                 | Femoral     | 0                 | 1.59                    |
| Rat #110      | Glucose                 | Femoral     | 15                | 1.87                    |
| Rat #110      | Glucose                 | Femoral     | 30                | 1.81                    |
| Rat #110      | Glucose                 | Femoral     | 60                | 1.95                    |
| Rat #110      | Glucose                 | Femoral     | 120               | 1.86                    |
| Rat #110      | Glucose                 | Femoral     | 240               | 1.93                    |
| Rat #110      | Glucose                 | Femoral     | 360               | 1.79                    |
| Rat #115      | Glucose                 | Femoral     | 0                 | 1.67                    |
| Rat #115      | Glucose                 | Femoral     | 15                | 1.89                    |
| Rat #115      | Glucose                 | Femoral     | 30                | 1.77                    |
| Rat #115      | Glucose                 | Femoral     | 60                | 1.94                    |
| Rat #115      | Glucose                 | Femoral     | 120               | 1.82                    |
| Rat #115      | Glucose                 | Femoral     | 240               | 1.67                    |
| Rat #115      | Glucose                 | Femoral     | 360               | 1.76                    |
| Rat #118      | Glucose                 | Femoral     | 0                 | 1.66                    |
| Rat #118      | Glucose                 | Femoral     | 15                | 1.95                    |
| Rat #118      | Glucose                 | Femoral     | 30                | 2.25                    |
| Rat #118      | Glucose                 | Femoral     | 60                | 2.30                    |
| Rat #118      | Glucose                 | Femoral     | 120               | 2.17                    |
| Rat #118      | Glucose                 | Femoral     | 240               | 2.12                    |
| Rat #118      | Glucose                 | Femoral     | 360               | 2.01                    |
| Rat #122      | Glucose                 | Femoral     | 0                 | 1.56                    |
| Rat #122      | Glucose                 | Femoral     | 15                | 1.66                    |
| Rat #122      | Glucose                 | Femoral     | 30                | 1.62                    |
| Rat #122      | Glucose                 | Femoral     | 60                | 1.71                    |
| Rat #122      | Glucose                 | Femoral     | 120               | 1.63                    |
| Rat #122      | Glucose                 | Femoral     | 240               | 1.65                    |
| Rat #122      | Glucose                 | Femoral     | 360               | 1.71                    |
| Rat #124      | Glucose                 | Femoral     | 0                 | 1.79                    |
| Rat #124      | Glucose                 | Femoral     | 15                | 1.94                    |
| Rat #124      | Glucose                 | Femoral     | 30                | 1.96                    |
| Rat #124      | Glucose                 | Femoral     | 60                | 1.94                    |
| Rat #124      | Glucose                 | Femoral     | 120               | 1.77                    |
| Rat #124      | Glucose                 | Femoral     | 240               | 1.70                    |
| Rat #124      | Glucose                 | Femoral     | 360               | 1.94                    |
| Rat #104      | Fructose                | Femoral     | 0                 | 1.57                    |
| Rat #104      | Fructose                | Femoral     | 15                | 5.98                    |
| Rat #104      | Fructose                | Femoral     | 30                | 6.55                    |
| Rat #104      | Fructose                | Femoral     | 60                | 3.73                    |
| Rat #104      | Fructose                | Femoral     | 120               | 3.34                    |
| Rat #104      | Fructose                | Femoral     | 240               | 1.78                    |
| Rat #104      | Fructose                | Femoral     | 360               | 1.71                    |
| Rat #106      | Fructose                | Femoral     | 0                 | 1.26                    |
| Rat #106      | Fructose                | Femoral     | 15                | 7.82                    |
| Rat #106      | Fructose                | Femoral     | 30                | 8.13                    |
| Rat #106      | Fructose                | Femoral     | 60                | 6.22                    |
| Rat #106      | Fructose                | Femoral     | 120               | 3.00                    |
| Rat #106      | Fructose                | Femoral     | 240               | 1.96                    |
| Rat #106      | Fructose                | Femoral     | 360               | 1.89                    |
| Rat #109      | Fructose                | Femoral     | 0                 | 1.63                    |
| Rat #109      | Fructose                | Femoral     | 15                | 5.99                    |
| Rat #109      | Fructose                | Femoral     | 30                | 8.39                    |

**S1 Table. Data for Fructose Concentration versus Time in Femoral and Portal Veins.**

| Rat ID   | Gavage Treatment       | Vein    | Time (min) | Fructose (mg/dL) |
|----------|------------------------|---------|------------|------------------|
| Rat #109 | Fructose               | Femoral | 60         | 5.03             |
| Rat #109 | Fructose               | Femoral | 120        | 2.90             |
| Rat #109 | Fructose               | Femoral | 240        | 2.02             |
| Rat #109 | Fructose               | Femoral | 360        | 1.99             |
| Rat #111 | Fructose               | Femoral | 0          | 1.74             |
| Rat #111 | Fructose               | Femoral | 15         | 6.18             |
| Rat #111 | Fructose               | Femoral | 30         | 7.88             |
| Rat #111 | Fructose               | Femoral | 60         | 6.37             |
| Rat #111 | Fructose               | Femoral | 120        | 3.21             |
| Rat #111 | Fructose               | Femoral | 240        | 1.96             |
| Rat #111 | Fructose               | Femoral | 360        | 2.08             |
| Rat #113 | Fructose               | Femoral | 0          | 1.84             |
| Rat #113 | Fructose               | Femoral | 15         | 5.66             |
| Rat #113 | Fructose               | Femoral | 30         | 6.62             |
| Rat #113 | Fructose               | Femoral | 60         | 4.93             |
| Rat #113 | Fructose               | Femoral | 120        | 3.60             |
| Rat #113 | Fructose               | Femoral | 240        | 1.82             |
| Rat #113 | Fructose               | Femoral | 360        | 1.69             |
| Rat #116 | Fructose               | Femoral | 0          | 1.99             |
| Rat #116 | Fructose               | Femoral | 15         | 6.61             |
| Rat #116 | Fructose               | Femoral | 30         | 8.45             |
| Rat #116 | Fructose               | Femoral | 60         | 3.46             |
| Rat #116 | Fructose               | Femoral | 120        | 2.92             |
| Rat #116 | Fructose               | Femoral | 240        | 1.89             |
| Rat #116 | Fructose               | Femoral | 360        | 2.22             |
| Rat #119 | Fructose               | Femoral | 0          | 1.95             |
| Rat #119 | Fructose               | Femoral | 15         | 6.05             |
| Rat #119 | Fructose               | Femoral | 30         | 7.03             |
| Rat #119 | Fructose               | Femoral | 60         | 7.18             |
| Rat #119 | Fructose               | Femoral | 120        | 3.06             |
| Rat #119 | Fructose               | Femoral | 240        | 1.88             |
| Rat #119 | Fructose               | Femoral | 360        | 1.90             |
| Rat #121 | Fructose               | Femoral | 0          | 1.61             |
| Rat #121 | Fructose               | Femoral | 15         | 5.51             |
| Rat #121 | Fructose               | Femoral | 30         | 6.56             |
| Rat #121 | Fructose               | Femoral | 60         | 6.09             |
| Rat #121 | Fructose               | Femoral | 120        | 3.54             |
| Rat #121 | Fructose               | Femoral | 240        | 1.82             |
| Rat #121 | Fructose               | Femoral | 360        | 1.66             |
| Rat #201 | 45/55 Glucose/Fructose | Femoral | 0          | 1.84             |
| Rat #201 | 45/55 Glucose/Fructose | Femoral | 15         | 4.95             |
| Rat #201 | 45/55 Glucose/Fructose | Femoral | 30         | 5.74             |
| Rat #201 | 45/55 Glucose/Fructose | Femoral | 60         | 2.95             |
| Rat #201 | 45/55 Glucose/Fructose | Femoral | 120        | 1.57             |
| Rat #201 | 45/55 Glucose/Fructose | Femoral | 240        | 1.43             |
| Rat #201 | 45/55 Glucose/Fructose | Femoral | 360        | 1.29             |
| Rat #203 | 45/55 Glucose/Fructose | Femoral | 0          | 1.33             |
| Rat #203 | 45/55 Glucose/Fructose | Femoral | 15         | 5.52             |
| Rat #203 | 45/55 Glucose/Fructose | Femoral | 30         | 6.21             |
| Rat #203 | 45/55 Glucose/Fructose | Femoral | 60         | 2.52             |
| Rat #203 | 45/55 Glucose/Fructose | Femoral | 120        | 2.09             |
| Rat #203 | 45/55 Glucose/Fructose | Femoral | 240        | 1.76             |
| Rat #203 | 45/55 Glucose/Fructose | Femoral | 360        | 1.73             |
| Rat #212 | 45/55 Glucose/Fructose | Femoral | 0          | 1.48             |
| Rat #212 | 45/55 Glucose/Fructose | Femoral | 15         | 4.38             |
| Rat #212 | 45/55 Glucose/Fructose | Femoral | 30         | 6.35             |
| Rat #212 | 45/55 Glucose/Fructose | Femoral | 60         | 3.51             |
| Rat #212 | 45/55 Glucose/Fructose | Femoral | 120        | 1.73             |
| Rat #212 | 45/55 Glucose/Fructose | Femoral | 240        | 1.31             |
| Rat #212 | 45/55 Glucose/Fructose | Femoral | 360        | 1.51             |
| Rat #216 | 45/55 Glucose/Fructose | Femoral | 0          | 1.10             |
| Rat #216 | 45/55 Glucose/Fructose | Femoral | 15         | 4.74             |
| Rat #216 | 45/55 Glucose/Fructose | Femoral | 30         | 5.32             |
| Rat #216 | 45/55 Glucose/Fructose | Femoral | 60         | 4.18             |

**S1 Table. Data for Fructose Concentration versus Time in Femoral and Portal Veins.**

| Rat ID   | Gavage Treatment       | Vein    | Time (min) | Fructose (mg/dL) |
|----------|------------------------|---------|------------|------------------|
| Rat #216 | 45/55 Glucose/Fructose | Femoral | 120        | 2.31             |
| Rat #216 | 45/55 Glucose/Fructose | Femoral | 240        | 2.40             |
| Rat #216 | 45/55 Glucose/Fructose | Femoral | 360        | 1.95             |
| Rat #219 | 45/55 Glucose/Fructose | Femoral | 0          | 1.60             |
| Rat #219 | 45/55 Glucose/Fructose | Femoral | 15         | 5.70             |
| Rat #219 | 45/55 Glucose/Fructose | Femoral | 30         | 5.67             |
| Rat #219 | 45/55 Glucose/Fructose | Femoral | 60         | 3.85             |
| Rat #219 | 45/55 Glucose/Fructose | Femoral | 120        | 2.30             |
| Rat #219 | 45/55 Glucose/Fructose | Femoral | 240        | 1.88             |
| Rat #219 | 45/55 Glucose/Fructose | Femoral | 360        | 1.45             |
| Rat #223 | 45/55 Glucose/Fructose | Femoral | 0          | 1.83             |
| Rat #223 | 45/55 Glucose/Fructose | Femoral | 15         | 5.79             |
| Rat #223 | 45/55 Glucose/Fructose | Femoral | 30         | 6.63             |
| Rat #223 | 45/55 Glucose/Fructose | Femoral | 60         | 3.79             |
| Rat #223 | 45/55 Glucose/Fructose | Femoral | 120        | 2.72             |
| Rat #223 | 45/55 Glucose/Fructose | Femoral | 240        | 1.93             |
| Rat #223 | 45/55 Glucose/Fructose | Femoral | 360        | 1.60             |
| Rat #226 | 45/55 Glucose/Fructose | Femoral | 0          | 1.66             |
| Rat #226 | 45/55 Glucose/Fructose | Femoral | 15         | 5.86             |
| Rat #226 | 45/55 Glucose/Fructose | Femoral | 30         | 6.69             |
| Rat #226 | 45/55 Glucose/Fructose | Femoral | 60         | 3.71             |
| Rat #226 | 45/55 Glucose/Fructose | Femoral | 120        | 1.98             |
| Rat #226 | 45/55 Glucose/Fructose | Femoral | 240        | 1.88             |
| Rat #226 | 45/55 Glucose/Fructose | Femoral | 360        | 1.41             |
| Rat #230 | 45/55 Glucose/Fructose | Femoral | 0          | 1.63             |
| Rat #230 | 45/55 Glucose/Fructose | Femoral | 15         | 6.21             |
| Rat #230 | 45/55 Glucose/Fructose | Femoral | 30         | 7.19             |
| Rat #230 | 45/55 Glucose/Fructose | Femoral | 60         | 3.87             |
| Rat #230 | 45/55 Glucose/Fructose | Femoral | 120        | 2.35             |
| Rat #230 | 45/55 Glucose/Fructose | Femoral | 240        | 2.07             |
| Rat #230 | 45/55 Glucose/Fructose | Femoral | 360        | 2.19             |
| Rat #233 | 45/55 Glucose/Fructose | Femoral | 0          | 1.19             |
| Rat #233 | 45/55 Glucose/Fructose | Femoral | 15         | 6.41             |
| Rat #233 | 45/55 Glucose/Fructose | Femoral | 30         | 6.25             |
| Rat #233 | 45/55 Glucose/Fructose | Femoral | 60         | 2.98             |
| Rat #233 | 45/55 Glucose/Fructose | Femoral | 120        | 2.00             |
| Rat #233 | 45/55 Glucose/Fructose | Femoral | 240        | 2.27             |
| Rat #233 | 45/55 Glucose/Fructose | Femoral | 360        | 2.22             |
| Rat #239 | 45/55 Glucose/Fructose | Femoral | 0          | 2.00             |
| Rat #239 | 45/55 Glucose/Fructose | Femoral | 15         | 8.13             |
| Rat #239 | 45/55 Glucose/Fructose | Femoral | 30         | 7.81             |
| Rat #239 | 45/55 Glucose/Fructose | Femoral | 60         | 7.91             |
| Rat #239 | 45/55 Glucose/Fructose | Femoral | 120        | 2.75             |
| Rat #239 | 45/55 Glucose/Fructose | Femoral | 240        | 2.28             |
| Rat #239 | 45/55 Glucose/Fructose | Femoral | 360        | 1.76             |
| Rat #102 | Water                  | Portal  | 0          | 1.45             |
| Rat #102 | Water                  | Portal  | 15         | 1.34             |
| Rat #102 | Water                  | Portal  | 30         | 1.73             |
| Rat #102 | Water                  | Portal  | 60         | 1.81             |
| Rat #102 | Water                  | Portal  | 120        | 1.82             |
| Rat #102 | Water                  | Portal  | 240        | 1.88             |
| Rat #102 | Water                  | Portal  | 360        | 1.66             |
| Rat #105 | Water                  | Portal  | 0          | 1.73             |
| Rat #105 | Water                  | Portal  | 15         | 1.81             |
| Rat #105 | Water                  | Portal  | 30         | 2.01             |
| Rat #105 | Water                  | Portal  | 60         | 1.76             |
| Rat #105 | Water                  | Portal  | 120        | 1.90             |
| Rat #105 | Water                  | Portal  | 240        | 2.01             |
| Rat #105 | Water                  | Portal  | 360        | 1.77             |
| Rat #108 | Water                  | Portal  | 0          | 1.59             |
| Rat #108 | Water                  | Portal  | 15         | 1.72             |
| Rat #108 | Water                  | Portal  | 30         | 1.95             |
| Rat #108 | Water                  | Portal  | 60         | 1.82             |
| Rat #108 | Water                  | Portal  | 120        | 2.02             |

**S1 Table. Data for Fructose Concentration versus Time in Femoral and Portal Veins.**

| Rat ID   | Gavage Treatment | Vein   | Time (min) | Fructose (mg/dL) |
|----------|------------------|--------|------------|------------------|
| Rat #108 | Water            | Portal | 240        | 2.00             |
| Rat #108 | Water            | Portal | 360        | 1.97             |
| Rat #112 | Water            | Portal | 0          | 1.80             |
| Rat #112 | Water            | Portal | 15         | 1.82             |
| Rat #112 | Water            | Portal | 30         | 1.91             |
| Rat #112 | Water            | Portal | 60         | 1.88             |
| Rat #112 | Water            | Portal | 120        | 1.78             |
| Rat #112 | Water            | Portal | 240        | 1.86             |
| Rat #112 | Water            | Portal | 360        | 1.76             |
| Rat #114 | Water            | Portal | 0          | 1.62             |
| Rat #114 | Water            | Portal | 15         | 1.72             |
| Rat #114 | Water            | Portal | 30         | 1.65             |
| Rat #114 | Water            | Portal | 60         | 1.71             |
| Rat #114 | Water            | Portal | 120        | 1.72             |
| Rat #114 | Water            | Portal | 240        | 1.66             |
| Rat #114 | Water            | Portal | 360        | 1.72             |
| Rat #117 | Water            | Portal | 0          | 1.87             |
| Rat #117 | Water            | Portal | 15         | 2.13             |
| Rat #117 | Water            | Portal | 30         | 2.09             |
| Rat #117 | Water            | Portal | 60         | 2.14             |
| Rat #117 | Water            | Portal | 120        | 1.98             |
| Rat #117 | Water            | Portal | 240        | 2.19             |
| Rat #117 | Water            | Portal | 360        | 2.04             |
| Rat #120 | Water            | Portal | 0          | 1.76             |
| Rat #120 | Water            | Portal | 15         | 1.82             |
| Rat #120 | Water            | Portal | 30         | 1.75             |
| Rat #120 | Water            | Portal | 60         | 1.76             |
| Rat #120 | Water            | Portal | 120        | 1.86             |
| Rat #120 | Water            | Portal | 240        | 1.95             |
| Rat #120 | Water            | Portal | 360        | 1.81             |
| Rat #123 | Water            | Portal | 0          | 1.72             |
| Rat #123 | Water            | Portal | 15         | 1.66             |
| Rat #123 | Water            | Portal | 30         | 1.65             |
| Rat #123 | Water            | Portal | 60         | 1.72             |
| Rat #123 | Water            | Portal | 120        | 1.73             |
| Rat #123 | Water            | Portal | 240        | 1.79             |
| Rat #123 | Water            | Portal | 360        | 1.63             |
| Rat #204 | Sucrose          | Portal | 0          | 0.86             |
| Rat #204 | Sucrose          | Portal | 15         | 51.34            |
| Rat #204 | Sucrose          | Portal | 30         | 13.83            |
| Rat #204 | Sucrose          | Portal | 60         | 15.23            |
| Rat #204 | Sucrose          | Portal | 120        | 1.77             |
| Rat #204 | Sucrose          | Portal | 240        | 1.10             |
| Rat #204 | Sucrose          | Portal | 360        | 1.04             |
| Rat #205 | Sucrose          | Portal | 0          | 1.15             |
| Rat #205 | Sucrose          | Portal | 15         | 26.04            |
| Rat #205 | Sucrose          | Portal | 30         | 26.03            |
| Rat #205 | Sucrose          | Portal | 60         | 4.71             |
| Rat #205 | Sucrose          | Portal | 120        | 1.19             |
| Rat #205 | Sucrose          | Portal | 240        | 1.02             |
| Rat #205 | Sucrose          | Portal | 360        | 1.34             |
| Rat #211 | Sucrose          | Portal | 0          | 1.23             |
| Rat #211 | Sucrose          | Portal | 15         | 42.39            |
| Rat #211 | Sucrose          | Portal | 30         | 40.87            |
| Rat #211 | Sucrose          | Portal | 60         | 9.73             |
| Rat #211 | Sucrose          | Portal | 120        | 5.80             |
| Rat #211 | Sucrose          | Portal | 240        | 1.05             |
| Rat #211 | Sucrose          | Portal | 360        | 1.55             |
| Rat #221 | Sucrose          | Portal | 0          | 1.67             |
| Rat #221 | Sucrose          | Portal | 15         | 28.09            |
| Rat #221 | Sucrose          | Portal | 30         | 38.59            |
| Rat #221 | Sucrose          | Portal | 60         | 10.48            |
| Rat #221 | Sucrose          | Portal | 120        | 2.65             |
| Rat #221 | Sucrose          | Portal | 240        | 1.85             |

**S1 Table. Data for Fructose Concentration versus Time in Femoral and Portal Veins.**

| <b>Rat ID</b> | <b>Gavage Treatment</b> | <b>Vein</b> | <b>Time (min)</b> | <b>Fructose (mg/dL)</b> |
|---------------|-------------------------|-------------|-------------------|-------------------------|
| Rat #221      | Sucrose                 | Portal      | 360               | 2.14                    |
| Rat #222      | Sucrose                 | Portal      | 0                 | 1.66                    |
| Rat #222      | Sucrose                 | Portal      | 15                | 12.89                   |
| Rat #222      | Sucrose                 | Portal      | 30                | 34.32                   |
| Rat #222      | Sucrose                 | Portal      | 60                | 13.42                   |
| Rat #222      | Sucrose                 | Portal      | 120               | 2.95                    |
| Rat #222      | Sucrose                 | Portal      | 240               | 2.24                    |
| Rat #222      | Sucrose                 | Portal      | 360               | 1.53                    |
| Rat #228      | Sucrose                 | Portal      | 0                 | 1.76                    |
| Rat #228      | Sucrose                 | Portal      | 15                | 25.79                   |
| Rat #228      | Sucrose                 | Portal      | 30                | 27.38                   |
| Rat #228      | Sucrose                 | Portal      | 60                | 12.10                   |
| Rat #228      | Sucrose                 | Portal      | 120               | 3.09                    |
| Rat #228      | Sucrose                 | Portal      | 240               | 2.05                    |
| Rat #228      | Sucrose                 | Portal      | 360               | 1.59                    |
| Rat #231      | Sucrose                 | Portal      | 0                 | 1.30                    |
| Rat #231      | Sucrose                 | Portal      | 15                | 22.70                   |
| Rat #231      | Sucrose                 | Portal      | 30                | 23.40                   |
| Rat #231      | Sucrose                 | Portal      | 60                | 12.98                   |
| Rat #231      | Sucrose                 | Portal      | 120               | 2.12                    |
| Rat #231      | Sucrose                 | Portal      | 240               | 1.68                    |
| Rat #231      | Sucrose                 | Portal      | 360               | 1.41                    |
| Rat #236      | Sucrose                 | Portal      | 0                 | 1.22                    |
| Rat #236      | Sucrose                 | Portal      | 15                | 18.27                   |
| Rat #236      | Sucrose                 | Portal      | 30                | 32.66                   |
| Rat #236      | Sucrose                 | Portal      | 60                | 6.98                    |
| Rat #236      | Sucrose                 | Portal      | 120               | 1.87                    |
| Rat #236      | Sucrose                 | Portal      | 240               | 1.39                    |
| Rat #236      | Sucrose                 | Portal      | 360               | 1.22                    |
| Rat #237      | Sucrose                 | Portal      | 0                 | 1.77                    |
| Rat #237      | Sucrose                 | Portal      | 15                | 37.04                   |
| Rat #237      | Sucrose                 | Portal      | 30                | 24.14                   |
| Rat #237      | Sucrose                 | Portal      | 60                | 4.48                    |
| Rat #237      | Sucrose                 | Portal      | 120               | 3.52                    |
| Rat #237      | Sucrose                 | Portal      | 240               | 1.66                    |
| Rat #237      | Sucrose                 | Portal      | 360               | 1.78                    |
| Rat #101      | Glucose                 | Portal      | 0                 | 1.54                    |
| Rat #101      | Glucose                 | Portal      | 15                | 1.65                    |
| Rat #101      | Glucose                 | Portal      | 30                | 1.90                    |
| Rat #101      | Glucose                 | Portal      | 60                | 1.62                    |
| Rat #101      | Glucose                 | Portal      | 120               | 1.65                    |
| Rat #101      | Glucose                 | Portal      | 240               | 1.67                    |
| Rat #101      | Glucose                 | Portal      | 360               | 1.50                    |
| Rat #103      | Glucose                 | Portal      | 0                 | 1.43                    |
| Rat #103      | Glucose                 | Portal      | 15                | 1.59                    |
| Rat #103      | Glucose                 | Portal      | 30                | 1.51                    |
| Rat #103      | Glucose                 | Portal      | 60                | 1.49                    |
| Rat #103      | Glucose                 | Portal      | 120               | 1.48                    |
| Rat #103      | Glucose                 | Portal      | 240               | 1.67                    |
| Rat #103      | Glucose                 | Portal      | 360               | 1.56                    |
| Rat #107      | Glucose                 | Portal      | 0                 | 1.54                    |
| Rat #107      | Glucose                 | Portal      | 15                | 1.99                    |
| Rat #107      | Glucose                 | Portal      | 30                | 1.88                    |
| Rat #107      | Glucose                 | Portal      | 60                | 1.83                    |
| Rat #107      | Glucose                 | Portal      | 120               | 1.76                    |
| Rat #107      | Glucose                 | Portal      | 240               | 1.96                    |
| Rat #107      | Glucose                 | Portal      | 360               | 1.72                    |
| Rat #110      | Glucose                 | Portal      | 0                 | 1.74                    |
| Rat #110      | Glucose                 | Portal      | 15                | 1.90                    |
| Rat #110      | Glucose                 | Portal      | 30                | 1.84                    |
| Rat #110      | Glucose                 | Portal      | 60                | 1.82                    |
| Rat #110      | Glucose                 | Portal      | 120               | 1.87                    |
| Rat #110      | Glucose                 | Portal      | 240               | 1.76                    |
| Rat #110      | Glucose                 | Portal      | 360               | 1.83                    |

**S1 Table. Data for Fructose Concentration versus Time in Femoral and Portal Veins.**

| <b>Rat ID</b> | <b>Gavage Treatment</b> | <b>Vein</b> | <b>Time (min)</b> | <b>Fructose (mg/dL)</b> |
|---------------|-------------------------|-------------|-------------------|-------------------------|
| Rat #115      | Glucose                 | Portal      | 0                 | 1.85                    |
| Rat #115      | Glucose                 | Portal      | 15                | 1.89                    |
| Rat #115      | Glucose                 | Portal      | 30                | 1.87                    |
| Rat #115      | Glucose                 | Portal      | 60                | 1.81                    |
| Rat #115      | Glucose                 | Portal      | 120               | 1.88                    |
| Rat #115      | Glucose                 | Portal      | 240               | 1.93                    |
| Rat #115      | Glucose                 | Portal      | 360               | 1.87                    |
| Rat #118      | Glucose                 | Portal      | 0                 | 1.74                    |
| Rat #118      | Glucose                 | Portal      | 15                | 2.38                    |
| Rat #118      | Glucose                 | Portal      | 30                | 2.26                    |
| Rat #118      | Glucose                 | Portal      | 60                | 2.15                    |
| Rat #118      | Glucose                 | Portal      | 120               | 2.09                    |
| Rat #118      | Glucose                 | Portal      | 240               | 2.12                    |
| Rat #118      | Glucose                 | Portal      | 360               | 2.09                    |
| Rat #122      | Glucose                 | Portal      | 0                 | 1.65                    |
| Rat #122      | Glucose                 | Portal      | 15                | 1.91                    |
| Rat #122      | Glucose                 | Portal      | 30                | 1.69                    |
| Rat #122      | Glucose                 | Portal      | 60                | 1.61                    |
| Rat #122      | Glucose                 | Portal      | 120               | 1.66                    |
| Rat #122      | Glucose                 | Portal      | 240               | 1.54                    |
| Rat #122      | Glucose                 | Portal      | 360               | 1.64                    |
| Rat #124      | Glucose                 | Portal      | 0                 | 1.81                    |
| Rat #124      | Glucose                 | Portal      | 15                | 1.92                    |
| Rat #124      | Glucose                 | Portal      | 30                | 1.73                    |
| Rat #124      | Glucose                 | Portal      | 60                | 1.94                    |
| Rat #124      | Glucose                 | Portal      | 120               | 1.99                    |
| Rat #124      | Glucose                 | Portal      | 240               | 1.88                    |
| Rat #124      | Glucose                 | Portal      | 360               | 1.82                    |
| Rat #104      | Fructose                | Portal      | 0                 | 1.58                    |
| Rat #104      | Fructose                | Portal      | 15                | 40.59                   |
| Rat #104      | Fructose                | Portal      | 30                | 31.20                   |
| Rat #104      | Fructose                | Portal      | 60                | 27.13                   |
| Rat #104      | Fructose                | Portal      | 120               | 10.36                   |
| Rat #104      | Fructose                | Portal      | 240               | 2.02                    |
| Rat #104      | Fructose                | Portal      | 360               | 1.47                    |
| Rat #106      | Fructose                | Portal      | 0                 | 2.55                    |
| Rat #106      | Fructose                | Portal      | 15                | 39.19                   |
| Rat #106      | Fructose                | Portal      | 30                | 30.02                   |
| Rat #106      | Fructose                | Portal      | 60                | 22.41                   |
| Rat #106      | Fructose                | Portal      | 120               | 5.99                    |
| Rat #106      | Fructose                | Portal      | 240               | 2.07                    |
| Rat #106      | Fructose                | Portal      | 360               | 1.83                    |
| Rat #109      | Fructose                | Portal      | 0                 | 1.74                    |
| Rat #109      | Fructose                | Portal      | 15                | 38.46                   |
| Rat #109      | Fructose                | Portal      | 30                | 29.26                   |
| Rat #109      | Fructose                | Portal      | 60                | 18.64                   |
| Rat #109      | Fructose                | Portal      | 120               | 8.26                    |
| Rat #109      | Fructose                | Portal      | 240               | 1.82                    |
| Rat #109      | Fructose                | Portal      | 360               | 1.72                    |
| Rat #111      | Fructose                | Portal      | 0                 | 1.73                    |
| Rat #111      | Fructose                | Portal      | 15                | 52.32                   |
| Rat #111      | Fructose                | Portal      | 30                | 60.21                   |
| Rat #111      | Fructose                | Portal      | 60                | 49.43                   |
| Rat #111      | Fructose                | Portal      | 120               | 17.84                   |
| Rat #111      | Fructose                | Portal      | 240               | 1.89                    |
| Rat #111      | Fructose                | Portal      | 360               | 0.72                    |
| Rat #113      | Fructose                | Portal      | 0                 | 1.47                    |
| Rat #113      | Fructose                | Portal      | 15                | 59.19                   |
| Rat #113      | Fructose                | Portal      | 30                | 43.41                   |
| Rat #113      | Fructose                | Portal      | 60                | 24.25                   |
| Rat #113      | Fructose                | Portal      | 120               | 12.87                   |
| Rat #113      | Fructose                | Portal      | 240               | 1.98                    |
| Rat #113      | Fructose                | Portal      | 360               | 1.48                    |
| Rat #116      | Fructose                | Portal      | 0                 | 1.81                    |



**S1 Table. Data for Fructose Concentration versus Time in Femoral and Portal Veins.**

| Rat ID   | Gavage Treatment       | Vein   | Time (min) | Fructose (mg/dL) |
|----------|------------------------|--------|------------|------------------|
| Rat #116 | Fructose               | Portal | 15         | 37.50            |
| Rat #116 | Fructose               | Portal | 30         | 30.73            |
| Rat #116 | Fructose               | Portal | 60         | 7.43             |
| Rat #116 | Fructose               | Portal | 120        | 2.94             |
| Rat #116 | Fructose               | Portal | 240        | 1.91             |
| Rat #116 | Fructose               | Portal | 360        | 2.23             |
| Rat #119 | Fructose               | Portal | 0          | 1.80             |
| Rat #119 | Fructose               | Portal | 15         | 38.62            |
| Rat #119 | Fructose               | Portal | 30         | 37.79            |
| Rat #119 | Fructose               | Portal | 60         | 31.85            |
| Rat #119 | Fructose               | Portal | 120        | 5.41             |
| Rat #119 | Fructose               | Portal | 240        | 2.02             |
| Rat #119 | Fructose               | Portal | 360        | 1.94             |
| Rat #121 | Fructose               | Portal | 0          | 1.60             |
| Rat #121 | Fructose               | Portal | 15         | 25.16            |
| Rat #121 | Fructose               | Portal | 30         | 27.36            |
| Rat #121 | Fructose               | Portal | 60         | 29.61            |
| Rat #121 | Fructose               | Portal | 120        | 13.62            |
| Rat #121 | Fructose               | Portal | 240        | 1.76             |
| Rat #121 | Fructose               | Portal | 360        | 1.71             |
| Rat #201 | 45/55 Glucose/Fructose | Portal | 0          | 0.85             |
| Rat #201 | 45/55 Glucose/Fructose | Portal | 15         | 28.58            |
| Rat #201 | 45/55 Glucose/Fructose | Portal | 30         | 35.35            |
| Rat #201 | 45/55 Glucose/Fructose | Portal | 60         | 11.32            |
| Rat #201 | 45/55 Glucose/Fructose | Portal | 120        | 1.23             |
| Rat #201 | 45/55 Glucose/Fructose | Portal | 240        | 1.18             |
| Rat #201 | 45/55 Glucose/Fructose | Portal | 360        | 1.07             |
| Rat #203 | 45/55 Glucose/Fructose | Portal | 0          | 0.85             |
| Rat #203 | 45/55 Glucose/Fructose | Portal | 15         | 50.91            |
| Rat #203 | 45/55 Glucose/Fructose | Portal | 30         | 40.43            |
| Rat #203 | 45/55 Glucose/Fructose | Portal | 60         | 10.03            |
| Rat #203 | 45/55 Glucose/Fructose | Portal | 120        | 1.96             |
| Rat #203 | 45/55 Glucose/Fructose | Portal | 240        | 1.47             |
| Rat #203 | 45/55 Glucose/Fructose | Portal | 360        | 1.63             |
| Rat #212 | 45/55 Glucose/Fructose | Portal | 0          | 1.17             |
| Rat #212 | 45/55 Glucose/Fructose | Portal | 15         | 25.61            |
| Rat #212 | 45/55 Glucose/Fructose | Portal | 30         | 37.76            |
| Rat #212 | 45/55 Glucose/Fructose | Portal | 60         | 11.15            |
| Rat #212 | 45/55 Glucose/Fructose | Portal | 120        | 2.01             |
| Rat #212 | 45/55 Glucose/Fructose | Portal | 240        | 0.99             |
| Rat #212 | 45/55 Glucose/Fructose | Portal | 360        | 1.02             |
| Rat #216 | 45/55 Glucose/Fructose | Portal | 0          | 0.68             |
| Rat #216 | 45/55 Glucose/Fructose | Portal | 15         | 24.20            |
| Rat #216 | 45/55 Glucose/Fructose | Portal | 30         | 21.28            |
| Rat #216 | 45/55 Glucose/Fructose | Portal | 60         | 18.23            |
| Rat #216 | 45/55 Glucose/Fructose | Portal | 120        | 4.53             |
| Rat #216 | 45/55 Glucose/Fructose | Portal | 240        | 2.17             |
| Rat #216 | 45/55 Glucose/Fructose | Portal | 360        | 0.99             |
| Rat #219 | 45/55 Glucose/Fructose | Portal | 0          | 1.75             |
| Rat #219 | 45/55 Glucose/Fructose | Portal | 15         | 26.15            |
| Rat #219 | 45/55 Glucose/Fructose | Portal | 30         | 28.00            |
| Rat #219 | 45/55 Glucose/Fructose | Portal | 60         | 7.55             |
| Rat #219 | 45/55 Glucose/Fructose | Portal | 120        | 2.44             |
| Rat #219 | 45/55 Glucose/Fructose | Portal | 240        | 1.92             |
| Rat #219 | 45/55 Glucose/Fructose | Portal | 360        | 1.75             |
| Rat #223 | 45/55 Glucose/Fructose | Portal | 0          | 1.81             |
| Rat #223 | 45/55 Glucose/Fructose | Portal | 15         | 31.71            |
| Rat #223 | 45/55 Glucose/Fructose | Portal | 30         | 19.17            |
| Rat #223 | 45/55 Glucose/Fructose | Portal | 60         | 13.89            |
| Rat #223 | 45/55 Glucose/Fructose | Portal | 120        | 4.33             |
| Rat #223 | 45/55 Glucose/Fructose | Portal | 240        | 1.75             |
| Rat #223 | 45/55 Glucose/Fructose | Portal | 360        | 1.84             |
| Rat #226 | 45/55 Glucose/Fructose | Portal | 0          | 1.64             |
| Rat #226 | 45/55 Glucose/Fructose | Portal | 15         | 36.54            |

**S1 Table. Data for Fructose Concentration versus Time in Femoral and Portal Veins.**

| <b>Rat ID</b> | <b>Gavage Treatment</b> | <b>Vein</b> | <b>Time (min)</b> | <b>Fructose (mg/dL)</b> |
|---------------|-------------------------|-------------|-------------------|-------------------------|
| Rat #226      | 45/55 Glucose/Fructose  | Portal      | 30                | 43.78                   |
| Rat #226      | 45/55 Glucose/Fructose  | Portal      | 60                | 6.42                    |
| Rat #226      | 45/55 Glucose/Fructose  | Portal      | 120               | 2.08                    |
| Rat #226      | 45/55 Glucose/Fructose  | Portal      | 240               | 1.83                    |
| Rat #226      | 45/55 Glucose/Fructose  | Portal      | 360               | 1.86                    |
| Rat #230      | 45/55 Glucose/Fructose  | Portal      | 0                 | 1.32                    |
| Rat #230      | 45/55 Glucose/Fructose  | Portal      | 15                | 28.51                   |
| Rat #230      | 45/55 Glucose/Fructose  | Portal      | 30                | 35.17                   |
| Rat #230      | 45/55 Glucose/Fructose  | Portal      | 60                | 7.61                    |
| Rat #230      | 45/55 Glucose/Fructose  | Portal      | 120               | 2.58                    |
| Rat #230      | 45/55 Glucose/Fructose  | Portal      | 240               | 2.10                    |
| Rat #230      | 45/55 Glucose/Fructose  | Portal      | 360               | 2.13                    |
| Rat #233      | 45/55 Glucose/Fructose  | Portal      | 0                 | 1.05                    |
| Rat #233      | 45/55 Glucose/Fructose  | Portal      | 15                | 30.35                   |
| Rat #233      | 45/55 Glucose/Fructose  | Portal      | 30                | 28.99                   |
| Rat #233      | 45/55 Glucose/Fructose  | Portal      | 60                | 8.64                    |
| Rat #233      | 45/55 Glucose/Fructose  | Portal      | 120               | 1.37                    |
| Rat #233      | 45/55 Glucose/Fructose  | Portal      | 240               | 1.64                    |
| Rat #233      | 45/55 Glucose/Fructose  | Portal      | 360               | 1.70                    |
| Rat #239      | 45/55 Glucose/Fructose  | Portal      | 0                 | 1.91                    |
| Rat #239      | 45/55 Glucose/Fructose  | Portal      | 15                | 41.17                   |
| Rat #239      | 45/55 Glucose/Fructose  | Portal      | 30                | 23.85                   |
| Rat #239      | 45/55 Glucose/Fructose  | Portal      | 60                | 9.11                    |
| Rat #239      | 45/55 Glucose/Fructose  | Portal      | 120               | 4.59                    |
| Rat #239      | 45/55 Glucose/Fructose  | Portal      | 240               | 1.49                    |
| Rat #239      | 45/55 Glucose/Fructose  | Portal      | 360               | 2.04                    |
