# Supplementary material for: Effects of fructose-containing sweeteners on fructose intestinal, hepatic, and oral bioavailability in dual-catheterized rats
Source: PubMed Central journal article supplement (PMC6224110; doi:10.1371/journal.pone.0207024), 2018-11-08
Supplement: pone.0207024.s002.pdf [file pone.0207024.s002.pdf]

**S2 Table. Data for Fructose AUC and T<sub>max</sub> in Femoral and Portal Veins.**

| Rat ID   | Gavage Treatment       | Fructose AUC <sub>sys</sub> (min*mg/dl) | Fructose AUC <sub>pv</sub> (min*mg/dl) | Fructose T <sub>max_sys</sub> (min) | Fructose T <sub>max_pv</sub> (min) |
|----------|------------------------|-----------------------------------------|----------------------------------------|-------------------------------------|------------------------------------|
| Rat #102 | Water                  | 633.66                                  | 638.62                                 | 238                                 | 238                                |
| Rat #105 | Water                  | 651.15                                  | 682.44                                 | 57                                  | 35                                 |
| Rat #108 | Water                  | 709.25                                  | 702.76                                 | 57                                  | 119                                |
| Rat #112 | Water                  | 674.64                                  | 656.86                                 | 243                                 | 35                                 |
| Rat #114 | Water                  | 619.48                                  | 608.54                                 | 60                                  | 18                                 |
| Rat #117 | Water                  | 715.94                                  | 752.89                                 | 119                                 | 240                                |
| Rat #120 | Water                  | 695.77                                  | 670.16                                 | 239                                 | 238                                |
| Rat #123 | Water                  | 589.25                                  | 620.13                                 | 63                                  | 240                                |
| Rat #204 | Sucrose                | 676.08                                  | 1899.13                                | 16                                  | 16                                 |
| Rat #205 | Sucrose                | 759.67                                  | 1462.61                                | 33                                  | 13                                 |
| Rat #211 | Sucrose                | 657.32                                  | 2645.48                                | 30                                  | 19                                 |
| Rat #221 | Sucrose                | 1025.93                                 | 2222.06                                | 33                                  | 33                                 |
| Rat #222 | Sucrose                | 1063.43                                 | 2060.87                                | 35                                  | 35                                 |
| Rat #228 | Sucrose                | 846.59                                  | 2059.07                                | 30                                  | 30                                 |
| Rat #231 | Sucrose                | 913.45                                  | 1853.03                                | 32                                  | 31                                 |
| Rat #236 | Sucrose                | 835.85                                  | 1622.95                                | 30                                  | 30                                 |
| Rat #237 | Sucrose                | 977.41                                  | 1829.86                                | 30                                  | 18                                 |
| Rat #101 | Glucose                | 584.07                                  | 589.51                                 | 236                                 | 36                                 |
| Rat #103 | Glucose                | 559.99                                  | 562.66                                 | 118                                 | 237                                |
| Rat #107 | Glucose                | 665.87                                  | 662.97                                 | 117                                 | 22                                 |
| Rat #110 | Glucose                | 675.36                                  | 654.84                                 | 60                                  | 12                                 |
| Rat #115 | Glucose                | 636.92                                  | 678.68                                 | 59                                  | 238                                |
| Rat #118 | Glucose                | 765.76                                  | 764.24                                 | 63                                  | 18                                 |
| Rat #122 | Glucose                | 596.80                                  | 583.02                                 | 65                                  | 16                                 |
| Rat #124 | Glucose                | 653.07                                  | 681.60                                 | 29                                  | 118                                |
| Rat #104 | Fructose               | 1020.07                                 | 3606.07                                | 29                                  | 19                                 |
| Rat #106 | Fructose               | 1212.87                                 | 3150.08                                | 31                                  | 15                                 |
| Rat #109 | Fructose               | 1128.27                                 | 3019.54                                | 29                                  | 15                                 |
| Rat #111 | Fructose               | 1214.93                                 | 5887.92                                | 27                                  | 27                                 |
| Rat #113 | Fructose               | 1122.90                                 | 4412.84                                | 28                                  | 17                                 |
| Rat #116 | Fructose               | 1106.06                                 | 2312.68                                | 30                                  | 15                                 |
| Rat #119 | Fructose               | 1173.68                                 | 3436.79                                | 58                                  | 13                                 |
| Rat #121 | Fructose               | 1130.55                                 | 3552.01                                | 30                                  | 58                                 |
| Rat #201 | 45/55 Glucose/Fructose | 726.62                                  | 1845.62                                | 30                                  | 30                                 |
| Rat #203 | 45/55 Glucose/Fructose | 836.07                                  | 2325.78                                | 29                                  | 17                                 |
| Rat #212 | 45/55 Glucose/Fructose | 773.94                                  | 1967.70                                | 32                                  | 31                                 |
| Rat #216 | 45/55 Glucose/Fructose | 992.69                                  | 2285.21                                | 31                                  | 14                                 |
| Rat #219 | 45/55 Glucose/Fructose | 908.82                                  | 1858.65                                | 14                                  | 33                                 |
| Rat #223 | 45/55 Glucose/Fructose | 985.84                                  | 2179.64                                | 32                                  | 14                                 |
| Rat #226 | 45/55 Glucose/Fructose | 903.38                                  | 2197.72                                | 30                                  | 30                                 |
| Rat #230 | 45/55 Glucose/Fructose | 1033.30                                 | 2095.44                                | 28                                  | 28                                 |
| Rat #233 | 45/55 Glucose/Fructose | 967.34                                  | 1877.28                                | 14                                  | 13                                 |
| Rat #239 | 45/55 Glucose/Fructose | 1263.17                                 | 2238.63                                | 14                                  | 13                                 |

AUC = area under the curve. PV: portal vein. SYS: femoral vein. T<sub>max</sub> = time at maximum observed concentration.
