# Supplementary material for: Effects of fructose-containing sweeteners on fructose intestinal, hepatic, and oral bioavailability in dual-catheterized rats
Source: PubMed Central journal article supplement (PMC6224110; doi:10.1371/journal.pone.0207024), 2018-11-08
Supplement: pone.0207024.s003.pdf [file pone.0207024.s003.pdf]

**S3 Table. Data for Fructose AdjC<sub>max</sub> in Femoral and Portal Veins.**

| <b>Rat ID</b> | <b>Gavage Treatment</b> | <b>Vein</b> | <b>Fructose C<sub>max</sub> (mg/dL)</b> | <b>Fructose Baseline (Time = 0) (mg/dL)</b> | <b>Fructose AdjC<sub>max</sub> (mg/dL)</b> |
|---------------|-------------------------|-------------|-----------------------------------------|---------------------------------------------|--------------------------------------------|
| Rat #102      | Water                   | Femoral     | 1.87                                    | 1.47                                        | 0.39                                       |
| Rat #105      | Water                   | Femoral     | 1.98                                    | 1.69                                        | 0.29                                       |
| Rat #108      | Water                   | Femoral     | 2.06                                    | 1.61                                        | 0.46                                       |
| Rat #112      | Water                   | Femoral     | 1.93                                    | 1.70                                        | 0.23                                       |
| Rat #114      | Water                   | Femoral     | 1.79                                    | 1.68                                        | 0.11                                       |
| Rat #117      | Water                   | Femoral     | 2.23                                    | 1.98                                        | 0.26                                       |
| Rat #120      | Water                   | Femoral     | 1.98                                    | 1.90                                        | 0.08                                       |
| Rat #123      | Water                   | Femoral     | 1.68                                    | 1.57                                        | 0.10                                       |
| Rat #204      | Sucrose                 | Femoral     | 4.44                                    | 1.32                                        | 3.12                                       |
| Rat #205      | Sucrose                 | Femoral     | 6.52                                    | 1.86                                        | 4.66                                       |
| Rat #211      | Sucrose                 | Femoral     | 4.36                                    | 1.36                                        | 3.00                                       |
| Rat #221      | Sucrose                 | Femoral     | 6.89                                    | 1.84                                        | 5.05                                       |
| Rat #222      | Sucrose                 | Femoral     | 5.92                                    | 2.25                                        | 3.67                                       |
| Rat #228      | Sucrose                 | Femoral     | 4.37                                    | 1.66                                        | 2.71                                       |
| Rat #231      | Sucrose                 | Femoral     | 5.62                                    | 1.45                                        | 4.17                                       |
| Rat #236      | Sucrose                 | Femoral     | 5.31                                    | 1.15                                        | 4.16                                       |
| Rat #237      | Sucrose                 | Femoral     | 6.73                                    | 1.63                                        | 5.11                                       |
| Rat #101      | Glucose                 | Femoral     | 1.70                                    | 1.53                                        | 0.16                                       |
| Rat #103      | Glucose                 | Femoral     | 1.63                                    | 1.40                                        | 0.23                                       |
| Rat #107      | Glucose                 | Femoral     | 2.02                                    | 1.68                                        | 0.33                                       |
| Rat #110      | Glucose                 | Femoral     | 1.95                                    | 1.59                                        | 0.36                                       |
| Rat #115      | Glucose                 | Femoral     | 1.94                                    | 1.67                                        | 0.27                                       |
| Rat #118      | Glucose                 | Femoral     | 2.30                                    | 1.66                                        | 0.64                                       |
| Rat #122      | Glucose                 | Femoral     | 1.71                                    | 1.56                                        | 0.15                                       |
| Rat #124      | Glucose                 | Femoral     | 1.96                                    | 1.79                                        | 0.17                                       |
| Rat #104      | Fructose                | Femoral     | 6.55                                    | 1.57                                        | 4.98                                       |
| Rat #106      | Fructose                | Femoral     | 8.13                                    | 1.26                                        | 6.87                                       |
| Rat #109      | Fructose                | Femoral     | 8.39                                    | 1.63                                        | 6.76                                       |
| Rat #111      | Fructose                | Femoral     | 7.88                                    | 1.74                                        | 6.14                                       |
| Rat #113      | Fructose                | Femoral     | 6.62                                    | 1.84                                        | 4.78                                       |
| Rat #116      | Fructose                | Femoral     | 8.45                                    | 1.99                                        | 6.46                                       |
| Rat #119      | Fructose                | Femoral     | 7.18                                    | 1.95                                        | 5.23                                       |
| Rat #121      | Fructose                | Femoral     | 6.56                                    | 1.61                                        | 4.95                                       |
| Rat #201      | 45/55 Glucose/Fructose  | Femoral     | 5.74                                    | 1.84                                        | 3.90                                       |

**S3 Table. Data for Fructose AdjC<sub>max</sub> in Femoral and Portal Veins.**

| <b>Rat ID</b> | <b>Gavage Treatment</b> | <b>Vein</b> | <b>Fructose C<sub>max</sub> (mg/dL)</b> | <b>Fructose Baseline (Time = 0) (mg/dL)</b> | <b>Fructose AdjC<sub>max</sub> (mg/dL)</b> |
|---------------|-------------------------|-------------|-----------------------------------------|---------------------------------------------|--------------------------------------------|
| Rat #203      | 45/55 Glucose/Fructose  | Femoral     | 6.21                                    | 1.33                                        | 4.88                                       |
| Rat #212      | 45/55 Glucose/Fructose  | Femoral     | 6.35                                    | 1.48                                        | 4.87                                       |
| Rat #216      | 45/55 Glucose/Fructose  | Femoral     | 5.32                                    | 1.10                                        | 4.22                                       |
| Rat #219      | 45/55 Glucose/Fructose  | Femoral     | 5.70                                    | 1.60                                        | 4.10                                       |
| Rat #223      | 45/55 Glucose/Fructose  | Femoral     | 6.63                                    | 1.83                                        | 4.80                                       |
| Rat #226      | 45/55 Glucose/Fructose  | Femoral     | 6.69                                    | 1.66                                        | 5.04                                       |
| Rat #230      | 45/55 Glucose/Fructose  | Femoral     | 7.19                                    | 1.63                                        | 5.56                                       |
| Rat #233      | 45/55 Glucose/Fructose  | Femoral     | 6.41                                    | 1.19                                        | 5.23                                       |
| Rat #239      | 45/55 Glucose/Fructose  | Femoral     | 8.13                                    | 2.00                                        | 6.13                                       |
| Rat #102      | Water                   | Portal      | 1.88                                    | 1.45                                        | 0.43                                       |
| Rat #105      | Water                   | Portal      | 2.01                                    | 1.73                                        | 0.27                                       |
| Rat #108      | Water                   | Portal      | 2.02                                    | 1.59                                        | 0.43                                       |
| Rat #112      | Water                   | Portal      | 1.91                                    | 1.80                                        | 0.11                                       |
| Rat #114      | Water                   | Portal      | 1.72                                    | 1.62                                        | 0.10                                       |
| Rat #117      | Water                   | Portal      | 2.19                                    | 1.87                                        | 0.32                                       |
| Rat #120      | Water                   | Portal      | 1.95                                    | 1.76                                        | 0.19                                       |
| Rat #123      | Water                   | Portal      | 1.79                                    | 1.72                                        | 0.07                                       |
| Rat #204      | Sucrose                 | Portal      | 51.34                                   | 0.86                                        | 50.48                                      |
| Rat #205      | Sucrose                 | Portal      | 26.04                                   | 1.15                                        | 24.89                                      |
| Rat #211      | Sucrose                 | Portal      | 42.39                                   | 1.23                                        | 41.15                                      |
| Rat #221      | Sucrose                 | Portal      | 38.59                                   | 1.67                                        | 36.92                                      |
| Rat #222      | Sucrose                 | Portal      | 34.32                                   | 1.66                                        | 32.66                                      |
| Rat #228      | Sucrose                 | Portal      | 27.38                                   | 1.76                                        | 25.62                                      |
| Rat #231      | Sucrose                 | Portal      | 23.40                                   | 1.30                                        | 22.10                                      |
| Rat #236      | Sucrose                 | Portal      | 32.66                                   | 1.22                                        | 31.44                                      |
| Rat #237      | Sucrose                 | Portal      | 37.04                                   | 1.77                                        | 35.28                                      |
| Rat #101      | Glucose                 | Portal      | 1.90                                    | 1.54                                        | 0.35                                       |
| Rat #103      | Glucose                 | Portal      | 1.67                                    | 1.43                                        | 0.24                                       |
| Rat #107      | Glucose                 | Portal      | 1.99                                    | 1.54                                        | 0.45                                       |
| Rat #110      | Glucose                 | Portal      | 1.90                                    | 1.74                                        | 0.16                                       |
| Rat #115      | Glucose                 | Portal      | 1.93                                    | 1.85                                        | 0.09                                       |
| Rat #118      | Glucose                 | Portal      | 2.38                                    | 1.74                                        | 0.64                                       |
| Rat #122      | Glucose                 | Portal      | 1.91                                    | 1.65                                        | 0.26                                       |
| Rat #124      | Glucose                 | Portal      | 1.99                                    | 1.81                                        | 0.18                                       |

**S3 Table. Data for Fructose AdjC<sub>max</sub> in Femoral and Portal Veins.**

| <b>Rat ID</b> | <b>Gavage Treatment</b> | <b>Vein</b> | <b>Fructose C<sub>max</sub> (mg/dL)</b> | <b>Fructose Baseline (Time = 0) (mg/dL)</b> | <b>Fructose AdjC<sub>max</sub> (mg/dL)</b> |
|---------------|-------------------------|-------------|-----------------------------------------|---------------------------------------------|--------------------------------------------|
| Rat #104      | Fructose                | Portal      | 40.59                                   | 1.58                                        | 39.02                                      |
| Rat #106      | Fructose                | Portal      | 39.19                                   | 2.55                                        | 36.63                                      |
| Rat #109      | Fructose                | Portal      | 38.46                                   | 1.74                                        | 36.73                                      |
| Rat #111      | Fructose                | Portal      | 60.21                                   | 1.73                                        | 58.48                                      |
| Rat #113      | Fructose                | Portal      | 59.19                                   | 1.47                                        | 57.72                                      |
| Rat #116      | Fructose                | Portal      | 37.50                                   | 1.81                                        | 35.69                                      |
| Rat #119      | Fructose                | Portal      | 38.62                                   | 1.80                                        | 36.83                                      |
| Rat #121      | Fructose                | Portal      | 29.61                                   | 1.60                                        | 28.01                                      |
| Rat #201      | 45/55 Glucose/Fructose  | Portal      | 35.35                                   | 0.85                                        | 34.51                                      |
| Rat #203      | 45/55 Glucose/Fructose  | Portal      | 50.91                                   | 0.85                                        | 50.06                                      |
| Rat #212      | 45/55 Glucose/Fructose  | Portal      | 37.76                                   | 1.17                                        | 36.59                                      |
| Rat #216      | 45/55 Glucose/Fructose  | Portal      | 24.20                                   | 0.68                                        | 23.52                                      |
| Rat #219      | 45/55 Glucose/Fructose  | Portal      | 28.00                                   | 1.75                                        | 26.24                                      |
| Rat #223      | 45/55 Glucose/Fructose  | Portal      | 31.71                                   | 1.81                                        | 29.90                                      |
| Rat #226      | 45/55 Glucose/Fructose  | Portal      | 43.78                                   | 1.64                                        | 42.13                                      |
| Rat #230      | 45/55 Glucose/Fructose  | Portal      | 35.17                                   | 1.32                                        | 33.85                                      |
| Rat #233      | 45/55 Glucose/Fructose  | Portal      | 30.35                                   | 1.05                                        | 29.30                                      |
| Rat #239      | 45/55 Glucose/Fructose  | Portal      | 41.17                                   | 1.91                                        | 39.26                                      |

AdjC<sub>max</sub> = maximum observed concentration - concentration at time = 0. C<sub>max</sub> = maximum observed concentration.
