# Supplementary material for: Effects of fructose-containing sweeteners on fructose intestinal, hepatic, and oral bioavailability in dual-catheterized rats
Source: PubMed Central journal article supplement (PMC6224110; doi:10.1371/journal.pone.0207024), 2018-11-08
Supplement: pone.0207024.s004.pdf [file pone.0207024.s004.pdf]

S4 Table. Data for Fructose AdjC<sub>max</sub>/D, AUC/D, and Bioavailability.

| Rat ID   | Gavage Treatment       | BW (g) | Fructose Amount (mg) | Dose (mg/g) | Fructose AdjC <sub>max_sys</sub> /D (mg/dL/(mg/g)) | Fructose AdjC <sub>max_pv</sub> (mg/dL/(mg/g)) | Fructose AUC <sub>sys</sub> /D (mg/dl*min/(mg/g)) | Fructose AUC <sub>pv</sub> /D (mg/dl*min/(mg/g)) | Q <sub>pv</sub> (ml/min/kg) | K <sub>b/p</sub> | F <sub>a</sub> x F <sub>g</sub> | F <sub>h</sub> | F     | E <sub>h</sub> |
|----------|------------------------|--------|----------------------|-------------|----------------------------------------------------|------------------------------------------------|---------------------------------------------------|--------------------------------------------------|-----------------------------|------------------|---------------------------------|----------------|-------|----------------|
| Rat #104 | Fructose               | 270.7  | 250                  | 0.924       | 5.39                                               | 42.25                                          | 1104.53                                           | 3904.65                                          | 32.9                        | 0.711            | 0.655                           | 0.283          | 0.185 | 0.717          |
| Rat #106 | Fructose               | 263.4  | 250                  | 0.949       | 7.24                                               | 38.60                                          | 1277.88                                           | 3318.92                                          | 32.9                        | 0.711            | 0.477                           | 0.385          | 0.184 | 0.615          |
| Rat #109 | Fructose               | 264.3  | 250                  | 0.946       | 7.14                                               | 38.83                                          | 1192.80                                           | 3192.25                                          | 32.9                        | 0.711            | 0.468                           | 0.374          | 0.175 | 0.626          |
| Rat #111 | Fructose               | 246.6  | 250                  | 1.014       | 6.06                                               | 57.68                                          | 1198.40                                           | 5807.84                                          | 32.9                        | 0.711            | 1.078                           | 0.206          | 0.222 | 0.794          |
| Rat #113 | Fructose               | 247.0  | 250                  | 1.012       | 4.72                                               | 57.02                                          | 1109.42                                           | 4359.89                                          | 32.9                        | 0.711            | 0.760                           | 0.254          | 0.193 | 0.746          |
| Rat #116 | Fructose               | 280.8  | 250                  | 0.890       | 7.26                                               | 40.09                                          | 1242.32                                           | 2597.60                                          | 32.9                        | 0.711            | 0.317                           | 0.478          | 0.152 | 0.522          |
| Rat #119 | Fructose               | 255.6  | 250                  | 0.978       | 5.35                                               | 37.65                                          | 1199.97                                           | 3513.77                                          | 32.9                        | 0.711            | 0.541                           | 0.342          | 0.185 | 0.658          |
| Rat #121 | Fructose               | 282.0  | 250                  | 0.887       | 5.59                                               | 31.59                                          | 1275.26                                           | 4006.66                                          | 32.9                        | 0.711            | 0.639                           | 0.318          | 0.203 | 0.682          |
| Rat #201 | 45/55 Glucose/Fructose | 303.1  | 137.5                | 0.454       | 8.60                                               | 76.06                                          | 1601.73                                           | 4068.41                                          | 32.9                        | 0.711            | 0.577                           | 0.394          | 0.227 | 0.606          |
| Rat #203 | 45/55 Glucose/Fructose | 269.7  | 137.5                | 0.510       | 9.56                                               | 98.19                                          | 1639.92                                           | 4561.91                                          | 32.9                        | 0.711            | 0.684                           | 0.359          | 0.246 | 0.641          |
| Rat #212 | 45/55 Glucose/Fructose | 250.8  | 137.5                | 0.548       | 8.88                                               | 66.75                                          | 1411.67                                           | 3589.09                                          | 32.9                        | 0.711            | 0.509                           | 0.393          | 0.200 | 0.607          |
| Rat #216 | 45/55 Glucose/Fructose | 259.3  | 137.5                | 0.530       | 7.96                                               | 44.35                                          | 1872.04                                           | 4309.49                                          | 32.9                        | 0.711            | 0.570                           | 0.434          | 0.248 | 0.566          |
| Rat #219 | 45/55 Glucose/Fructose | 269.3  | 137.5                | 0.511       | 8.02                                               | 51.40                                          | 1779.96                                           | 3640.24                                          | 32.9                        | 0.711            | 0.435                           | 0.489          | 0.213 | 0.511          |
| Rat #223 | 45/55 Glucose/Fructose | 266.1  | 137.5                | 0.517       | 9.28                                               | 57.87                                          | 1907.86                                           | 4218.20                                          | 32.9                        | 0.711            | 0.540                           | 0.452          | 0.244 | 0.548          |
| Rat #226 | 45/55 Glucose/Fructose | 266.9  | 137.5                | 0.515       | 9.78                                               | 81.78                                          | 1753.55                                           | 4265.97                                          | 32.9                        | 0.711            | 0.588                           | 0.411          | 0.242 | 0.589          |
| Rat #230 | 45/55 Glucose/Fructose | 258.3  | 137.5                | 0.532       | 10.44                                              | 63.59                                          | 1941.10                                           | 3936.39                                          | 32.9                        | 0.711            | 0.467                           | 0.493          | 0.230 | 0.507          |
| Rat #233 | 45/55 Glucose/Fructose | 291.4  | 137.5                | 0.472       | 11.08                                              | 62.09                                          | 2050.05                                           | 3978.47                                          | 32.9                        | 0.711            | 0.451                           | 0.515          | 0.232 | 0.485          |
| Rat #239 | 45/55 Glucose/Fructose | 267.2  | 137.5                | 0.515       | 11.91                                              | 76.30                                          | 2454.68                                           | 4350.27                                          | 32.9                        | 0.711            | 0.443                           | 0.564          | 0.250 | 0.436          |
| Rat #204 | Sucrose                | 282.8  | 125                  | 0.442       | 7.05                                               | 114.21                                         | 1529.56                                           | 4296.58                                          | 32.9                        | 0.711            | 0.647                           | 0.356          | 0.230 | 0.644          |
| Rat #205 | Sucrose                | 271.9  | 125                  | 0.460       | 10.14                                              | 54.14                                          | 1652.44                                           | 3181.47                                          | 32.9                        | 0.711            | 0.358                           | 0.519          | 0.186 | 0.481          |
| Rat #211 | Sucrose                | 261.3  | 125                  | 0.478       | 6.28                                               | 86.02                                          | 1374.05                                           | 5530.11                                          | 32.9                        | 0.711            | 0.972                           | 0.248          | 0.242 | 0.752          |
| Rat #221 | Sucrose                | 272.0  | 125                  | 0.460       | 10.99                                              | 80.34                                          | 2232.43                                           | 4835.20                                          | 32.9                        | 0.711            | 0.609                           | 0.462          | 0.281 | 0.538          |
| Rat #222 | Sucrose                | 272.0  | 125                  | 0.460       | 7.98                                               | 71.07                                          | 2314.02                                           | 4484.45                                          | 32.9                        | 0.711            | 0.508                           | 0.516          | 0.262 | 0.484          |
| Rat #228 | Sucrose                | 283.5  | 125                  | 0.441       | 6.14                                               | 58.10                                          | 1920.06                                           | 4669.96                                          | 32.9                        | 0.711            | 0.643                           | 0.411          | 0.264 | 0.589          |
| Rat #231 | Sucrose                | 268.1  | 125                  | 0.466       | 8.93                                               | 47.39                                          | 1959.17                                           | 3974.39                                          | 32.9                        | 0.711            | 0.471                           | 0.493          | 0.232 | 0.507          |
| Rat #236 | Sucrose                | 288.3  | 125                  | 0.434       | 9.59                                               | 72.51                                          | 1927.81                                           | 3743.17                                          | 32.9                        | 0.711            | 0.425                           | 0.515          | 0.219 | 0.485          |
| Rat #237 | Sucrose                | 280.4  | 125                  | 0.446       | 11.45                                              | 79.14                                          | 2192.52                                           | 4104.75                                          | 32.9                        | 0.711            | 0.447                           | 0.534          | 0.239 | 0.466          |

AdjC<sub>max</sub>/D = adjusted maximum observed concentration normalized by fructose dose. AUC/D = area under the curve normalized by fructose dose. BW = body weight at sacrifice. D = fructose amount/body weight. E<sub>h</sub> = hepatic extraction ratio.

F = systemic bioavailability. F<sub>a</sub> x F<sub>g</sub> = intestinal availability. F<sub>h</sub> = hepatic availability. K<sub>b/p</sub> = whole blood to plasma concentration ratio. PV: portal vein. Q<sub>pv</sub> = portal blood flow. SYS: femoral vein.
