# Supplementary material for: Effects of fructose-containing sweeteners on fructose intestinal, hepatic, and oral bioavailability in dual-catheterized rats
Source: PubMed Central journal article supplement (PMC6224110; doi:10.1371/journal.pone.0207024), 2018-11-08
Supplement: pone.0207024.s005.pdf [file pone.0207024.s005.pdf]

**S5 Table. Data for Whole Blood to Plasma Ratio of Fructose.**

| <b>Compound</b> | <b>Sample#</b> | <b>Hematocrit (%)</b> | <b>C<sub>RBC</sub> (μM)</b> | <b>C<sub>PL</sub> (μM)</b> | <b>K<sub>b/p</sub></b> |
|-----------------|----------------|-----------------------|-----------------------------|----------------------------|------------------------|
| Fructose        | 1              | 43.5                  | 255.3                       | 637.8                      | 0.739                  |
|                 | 2              | 46.5                  | 189.2                       | 572.5                      | 0.689                  |
|                 | 3              | 43                    | 179.0                       | 573.9                      | 0.704                  |

C<sub>RBC</sub> = concentration in red blood cells. C<sub>PL</sub> = concentration in plasma. K<sub>b/p</sub> = whole blood to plasma concentration ratio.
